# Supplementary material for: Changes in internalizing and externalizing problems in Dutch children and adolescents receiving youth care before and during the COVID-19 pandemic
Source: bioRxiv or medRxiv preprint supplement (doi:10.1101/2023.12.11.23299052), 2023-12-11
Supplement: Supplementary file [file media-1.pdf]

## Supplementary materials

**Table 1**

*Correlations between study (internalizing and externalizing problems before and after treatment) and control (child's age at start of treatment, treatment duration, sex of both the child and informant) variables*

|                                                              | 1                | 2                | 3                 | 4                 | 5                 | 6    | 7 | 8 |
|--------------------------------------------------------------|------------------|------------------|-------------------|-------------------|-------------------|------|---|---|
| 1. Internalizing problems before treatment ( <i>T</i> score) | -                |                  |                   |                   |                   |      |   |   |
| 2. Internalizing problems after treatment ( <i>T</i> score)  | .64 <sup>B</sup> | -                |                   |                   |                   |      |   |   |
| 3. Externalizing problems before treatment ( <i>T</i> score) | .49 <sup>B</sup> | .37 <sup>B</sup> | -                 |                   |                   |      |   |   |
| 4. Externalizing problems after treatment ( <i>T</i> score)  | .36 <sup>B</sup> | .61 <sup>B</sup> | .71 <sup>B</sup>  | -                 |                   |      |   |   |
| 5. Age at start of treatment                                 | .07 <sup>A</sup> | .11 <sup>B</sup> | .10 <sup>B</sup>  | .13 <sup>B</sup>  | -                 |      |   |   |
| 6. Treatment duration (days)                                 | .02              | -.02             | -.08 <sup>B</sup> | -.08 <sup>B</sup> | -.27 <sup>B</sup> | -    |   |   |
| 7. Sex of child                                              | .10 <sup>B</sup> | .04              | -.05              | -.05              | -.002             | 0.02 | - |   |

|                     |                  |     |                  |                  |      |      |      |   |
|---------------------|------------------|-----|------------------|------------------|------|------|------|---|
| 8. Sex of informant | .09 <sup>B</sup> | .05 | .12 <sup>B</sup> | .06 <sup>A</sup> | -.01 | -.01 | -.02 | - |
|---------------------|------------------|-----|------------------|------------------|------|------|------|---|

---

Note: <sup>A</sup>  $p < .05$ ; <sup>B</sup>  $p < .001$
